# Supplementary material
Source: publisher figshare collection journal article supplement (https://frontiersin.figshare.com/ndownloader/files/31383412)
Supplement: Supplementary file 1 [file 31383412]

## **Appendix 1** - Selected training and resources for educators to supplement Table 1

### *Trainings & Tools*

Academics for Black Survival and Wellness. Anti-racism training

<https://www.academics4blacklives.com/>

Community Commons. Engaging People with Lived Experience Toolkit.

<https://www.communitycommons.org/collections/Engaging-Lived-Experience-Toolkit>

Food Solutions New England. 21-day Racial Equity Habit Building Challenge:

<https://foodsolutionsne.org/21-day-racial-equity-habit-building-challenge/>

Gesturing Towards Decolonial Futures (University of British Columbia):

<https://decolonialfutures.net/>

Just Food Educational Resource (University of British Columbia):

<https://justfood.landfood.ubc.ca/>

Racial Equity Tools. Racial Equity Tools Curricula list

<https://www.racialequitytools.org/resources/curricula>

Racial Equity Tools. Racial Equity Tools Glossary

<https://www.racialequitytools.org/glossary>

Soul Fire Farm, a Black, Indigenous, and Other People of Color (BIPOC)-centered community farm in Grafton, NY. Uprooting Racism in the Food System training workshop: <https://www.soulfirefarm.org/food-sovereignty-education/uprooting-racism/>

Teaching Sustainable Food Systems in Our Times Sandbox Webinar Series

[https://waferx.montana.edu/sandbox\\_webinar\\_series.html](https://waferx.montana.edu/sandbox_webinar_series.html)

### *Publications*

Castro, A. R. & Collins, C.S.. (2021). Asian American women in STEM in the lab with “White Men Named John.” *Science Education*, 105(1), 33–61.

<https://doi.org/10.1002/sce.21598>

Cordova-Cobo, D., & Cobo, V., III (2020). Anti-racist, trauma-informed teaching. The Public Good. <https://sites.google.com/tc.columbia.edu/traumainformedteaching>

Kelly, R., Carr, K., Pirog, R., Guel, A., Henderson, J., Wilcox, K., Wimberg, T., García Polanco, V., Babayode, D., Watson, K., Nelson, E. (2021). *An annotated bibliography on structural racism present in the U.S. food system* (8th ed.). Michigan State University Center for Regional Food Systems.

[https://foodsystems.msu.edu/resources/structural\\_racism\\_in\\_us\\_food\\_system](https://foodsystems.msu.edu/resources/structural_racism_in_us_food_system)

Kumanyika, S. (2019). A Framework for Increasing Equity Impact in Obesity Prevention. *American Journal of Public Health*, 109(10); 1350–1357.

Leung, M., Agaronov, A., Entwistle, T., Henry, L., Sharkey-Buckey, J., Freudenberg, N. (2016). Voices Through Cameras: Using Photovoice to Explore Food Justice Issues with Minority Youth in East Harlem, New York. *Health Promotion Practice*, 18(2): 211– 220.

Liu, Y. (2012). Good food and good jobs for all: Challenges and Opportunities to Advance Racial and Economic Equity in the Food System. Applied Research Center. <https://www.raceforward.org/research/reports/good-food-and-good-jobs-all>

Marker, M. (2006). After the Makah whale hunt: Indigenous Knowledge and limits to multicultural discourse. *Urban Education*, 41(5), 482–505.  
<https://doi.org/10.1177/0042085906291923>

Martin, M. J., & Hartmann, K. (2020). Intersectionality of whiteness, racism, and homophobia among agriculture students. *Whiteness and Education*, 0(0), 1–15.  
<https://doi.org/10.1080/23793406.2020.1839942>

Rodman-Alvarez, S. & Colasanti, K. (2019). Measuring racial equity in the food system: Established and suggested metrics. East Lansing, MI: Michigan State University Center for Regional Food Systems.

Setiloane, K. (2016). Beyond the Melting Pot and Salad Bowl Views of Cultural Diversity: Advancing Cultural Diversity Education of Nutrition Educators. *Journal of Nutrition Education and Behavior*, Vol 48 pp. 664–668.
